# Supplementary material for: Responses to Developmental Temperature Fluctuation in Life History Traits of Five Drosophila Species (Diptera: Drosophilidae) from Different Thermal Niches
Source: MDPI journal article supplement (doi:10.3390/insects12100925), 2021-10-11
Supplement: s1 [file s1]

## Supplemental material

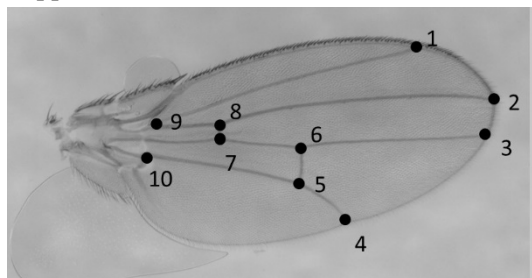

Figure S1. The ten wing landmarks used to calculate wing size and shape.

Table S1. Collection site (collection time), latitude, annual mean temperature (MT), mean of daily low ( $T_{\text{MIN}}$ ) and high ( $T_{\text{MAX}}$ ) temperature (weatherbase.com). The experiment was conducted in November 2010.

| Species                | Collection site                               | Latitude | MT               | $T_{\text{MIN}}$    | $T_{\text{MAX}}$ |
|------------------------|-----------------------------------------------|----------|------------------|---------------------|------------------|
| <i>D. bipectinata</i>  | Gordonvale, Queensland, Australia (Feb. 2008) | 16.55 S  | $24.1 \pm 2.61$  | $20.1 \pm 2.73$     | $29.1 \pm 2.33$  |
| <i>D. buzzati</i>      | Chumbicha, Catamarca, Argentina (2009)        | 28.26. S | $20.3 \pm 5.31$  | $13.4 \pm 5.82$     | $27.7 \pm 4.85$  |
| <i>D. immigrans</i>    | Aarhus, Denmark (2009)                        | 56.18 N  | $8.6 \pm 5.42^*$ | $4.0 \pm 4.71^{**}$ | $10.8 \pm 6.94$  |
| <i>D. melanogaster</i> | Melbourne, Vic., Australia (Dec. 2007)        | 37.41 S  | $14.3 \pm 4.16$  | $8.9 \pm 3.00$      | $19.0 \pm 5.08$  |
| <i>D. mojavensis</i>   | Anza Borrego, CA, USA                         | 33.13 N  | $22.6 \pm 7.30$  | $14.3 \pm 6.68$     | $30.9 \pm 7.95$  |

\*No data available for January and February. Mean biased upwards.\*\* No data available for December. Mean biased upwards.

Table S2. Results of the analysis comparing egg-to-adult viability of species and developmental temperature. Separate tests conducted for the constant (20, 25 and 30°C) and fluctuating (25°C CT, small FT and large FT) temperature regimes.

|                         | Factor                       | DF | MS    | F         |
|-------------------------|------------------------------|----|-------|-----------|
| Constant Temperature    | Temperature                  | 2  | 18.65 | 70.42***  |
|                         | Species                      | 4  | 42.83 | 161.72*** |
|                         | Temperature $\times$ species | 8  | 5.59  | 21.13***  |
| Fluctuating temperature | Temperature                  | 2  | 1.83  | 6.20**    |
|                         | Species                      | 4  | 30.05 | 101.98*** |
|                         | Temperature $\times$ species | 8  | 2.07  | 7.03***   |

\*\* $P < 0.01$ , \*\*\* $P < 0.001$

Table S3. Results of the analysis of wing size comparing species, temperatures and sex. Separate tests conducted for the constant (20, 25 and 30°C) and fluctuating (25°C CT, small FT and large FT) temperature regimes.

| Constant temperature                |    |       |            | Fluctuating temperature |        |            |
|-------------------------------------|----|-------|------------|-------------------------|--------|------------|
| Factor                              | DF | MS    | F          | DF                      | MS     | F          |
| Temperature                         | 2  | 354.0 | 21037.6*** | 2                       | 11.58  | 1402.6***  |
| Species                             | 4  | 321.3 | 38193.4*** | 4                       | 302.85 | 36671.9*** |
| Sex                                 | 1  | 88.2  | 10480.6*** | 1                       | 90.12  | 10912.6*** |
| Temperature $\times$ species        | 7  | 1.8   | 211.3***   | 8                       | 0.70   | 84.6***    |
| Temperature $\times$ sex            | 2  | 0.3   | 33.6***    | 2                       | 0.02   | 2.7        |
| Species $\times$ sex                | 4  | 1.4   | 165.4***   | 4                       | 1.41   | 170.4***   |
| Temp. $\times$ species $\times$ sex | 7  | 0.0   | 0.9        | 8                       | 0.02   | 2.4*       |

\* $P < 0.05$ , \*\*\* $P < 0.001$

Table S4. Results of the analysis of wing aspect ratio comparing species, temperatures and sex. Separate tests conducted for the constant (20, 25 and 30°C) and fluctuating (25°C CT, small FT and large FT) temperature regimes.

| Constant temperature                |    |        |           | Fluctuating temperature |        |           |
|-------------------------------------|----|--------|-----------|-------------------------|--------|-----------|
| Factor                              | DF | MS     | F         | DF                      | MS     | F         |
| Temperature                         | 2  | 11.86  | 59.0***   | 2                       | 10.68  | 52.1***   |
| Species                             | 4  | 240.42 | 1195.9*** | 4                       | 267.62 | 1306.7*** |
| Sex                                 | 1  | 106.65 | 530.5***  | 1                       | 108.04 | 527.5***  |
| Temperature $\times$ species        | 7  | 8.24   | 41.01***  | 8                       | 2.20   | 10.7***   |
| Temperature $\times$ sex            | 2  | 2.62   | 13.1***   | 2                       | 0.13   | 0.6       |
| Species $\times$ sex                | 4  | 8.72   | 43.4***   | 4                       | 9.76   | 47.7***   |
| Temp. $\times$ species $\times$ sex | 7  | 0.39   | 1.9       | 8                       | 0.09   | 0.4       |

\*\*\* $P < 0.001$
